# Supplementary figures and images for: Fractal properties of forest fires in Amazonia as a basis for modelling pan-tropical burnt area
Source: Copernicus journal article supplement (doi:10.5194/bg-11-1449-2014), 2014-03-19

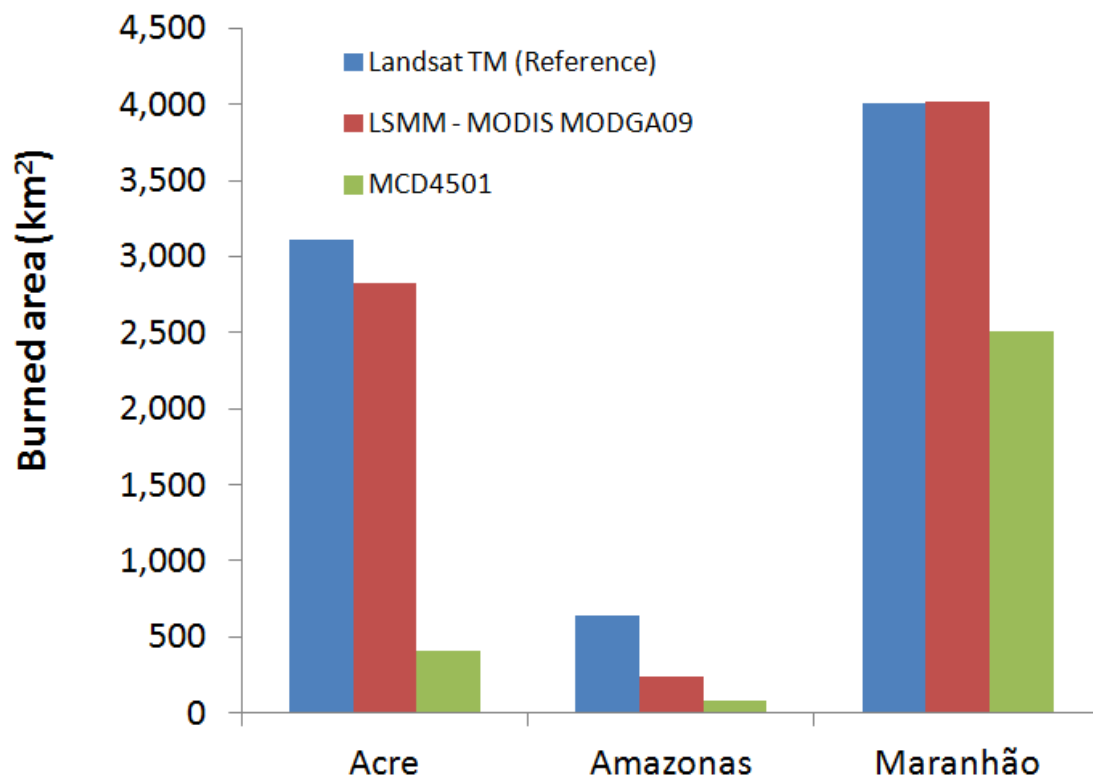

**Figure S1:** Comparison of the Landsat TM, LSMM – MODIS MODGA09 and MCD4501 burnt area products

Supplement: Supplementary file 1 [file bg-11-1449-2014-supplement.pdf]
